1 Title

2

3 Spatial-Temporal Trends in Bed Bug Complaints in New York City

4

5 Authors

6 Kathryn P. Hacker<sup>1</sup>, Andrew J. Greenlee<sup>2</sup>, Alison L. Hill<sup>3</sup>, and Daniel Schneider<sup>2</sup>, Michael Z.

7 Levy<sup>1</sup>

8

9 <sup>1</sup> Department of Epidemiology, Biostatistics, and Informatics, University of Pennsylvania,  
10 Philadelphia, PA 19104.

11 <sup>2</sup> Department of Urban and Regional Planning, University of Illinois at Urbana-Champaign,  
12 Urbana, IL 61820.

13 <sup>3</sup> Program for Evolutionary Dynamics, Harvard University, Cambridge, MA 02138.

14

15

16

17

18

19

20

21

22

23

24 Abstract

25           Bed bug outbreaks pose a major challenge in urban environments and cause significant  
26 strain on public resources. Few studies have systematically analyzed the epidemic or the  
27 potential effects of policies to combat bed bugs. Here we use three sources of administrative data  
28 to characterize the spatial-temporal trends of bed bug complaints and reports in New York City.  
29 Bed bug specific complaints have significantly decreased ( $-0.021 \pm \text{CI } -0.027 \text{ -- } -0.014$ ,  $p <$   
30  $0.001$  decrease in complaints per 100,000 people per month) from 2014–2019. Despite the  
31 decrease areas with high bed bug infestation tend to remain infested, highlighting the persistence  
32 of these pests. There are limitations to the datasets; still the evidence available suggests that  
33 interventions employed by New York City residents and lawmakers are stemming the bed bug  
34 epidemic and may serve as a model for other large cities.

35

36 Introduction

37           Bed bugs (*Cimex lectularius*) have reemerged as a substantial public health and economic  
38 issue, particularly in dense urban environments (1–5). During the early 2000s, bed bug  
39 infestations steadily increased (2, 3, 6, 7). While bed bugs were largely controlled after the  
40 Second World War, their populations have resurged since. The resurgence of bed bug  
41 populations is likely due to a combination of many factors, among these insecticide resistance (3,  
42 8–11), increased mobility (10, 12, 13), and exchange of used furniture (14–16). By the early  
43 1990s, bed bugs were again documented globally as an arthropod pest of public health  
44 importance (1, 4, 8, 17–19).

45           The overall prevalence of bed bug infestation in major US cities is high, though rarely  
46 systematically measured, and has attracted the attention of the media and policy entities (7, 20–

47 22). Trends in bed bug resurgence and control effectiveness are poorly understood. Many cities  
48 lack a standardized reporting system and many infestations are handled individually (to varying  
49 degrees of success) and residents may choose not to report infestation to building managers or  
50 city authorities. In 2014, New York City established a reporting system for bed bug infestation  
51 through the city's 311 database, a dedicated phone and online system to access NYC services  
52 and information (20, 23). Additionally in 2014, the New York City department of Health and  
53 Human Services collected data on probable bed bug infestations, estimating a prevalence of  
54 5.1% of households citywide, with some areas (defined by New York United Hospital Fund  
55 Regions) reporting up to 12% of households infested (24). Other cities across the United States  
56 have experienced high levels of infestation and have responded with various policy and public  
57 health interventions (7, 22).

58 The public health burden of bed bug infestations is substantial. Not only are residents of  
59 infested dwellings subject to physical symptoms such as painful bites, rashes, sleep loss, and  
60 allergic reactions, but some also suffer immense psychological and emotional distress (3, 18, 25–  
61 27). Residents of infested dwellings report increased anxiety and depression, linked both to the  
62 physicality of the infestation as well as the incurred social stigma (28, 29). The health burden on  
63 the homebound and elderly is particularly relevant, as home healthcare personnel and social  
64 workers without adequate training can be reticent, or refuse to, enter infested areas (30, 31).  
65 Additionally, due to the expense and difficulty of effective extermination, poisoning, property  
66 damage, and exposure to inexpertly applied insecticides has occurred (32, 33). Bed bugs are  
67 competent hosts for *Trypanosoma cruzi* and *Bartonella quintana*, the etiologic agents of Chagas  
68 disease and trench fever respectively (3, 34, 35). Whether bed bugs are, or could become,  
69 epidemiologically relevant in the transmission of these agents remains unclear.

70 To combat this public health crisis, New York City has instituted two bed bug disclosure  
71 policies. In 2010, New York passed its first ordinance that required landlords to report bed bug  
72 infestations occurring in the previous year to residents and prospective residents (36). The city  
73 passed a second disclosure ordinance in 2017 requiring landlords to report annually all units  
74 infested or treated for bed bug infestation, and to notify all residents in the building, rather than  
75 only current or prospective tenants of a given unit (37). These ordinances mandate disclosure by  
76 landlords to tenants, but do not include systematic sampling for bed bugs.

77 Making use of data resulting from 311 and other reporting systems, we assess the spatial-  
78 temporal trends in bed bug complaints and inquiries made by New York City residents and  
79 building owners. In addition to exploring these trends, we question whether the policy-driven  
80 approaches to managing bed bug infestations have resulted in a decrease in the rate of complaints  
81 over time. We also question whether these policy approaches have had differential impacts  
82 across New York City's boroughs.

83

84 Methods

85 *Databases*

86 We examine three databases archived by New York City: bed bug inquiries registered by  
87 the city's 311 non-emergency reporting system, official bed bug complaints made to the city's  
88 Department of Housing Preservation and Development, and building owner reported bed bug  
89 infestations reported to the city's Department of Housing Preservation and Development. The  
90 specifics of each database (attributes, time scales, and geographic information) are summarized  
91 in Table 1 and described in detail below.

92

93 *NYC Open Data and NYC 311: 311 inquiries and 311 bed bug specific requests*

94           Since 2009, New York City’s Open Data Portal has maintained an online database of  
95 information collected by the city government (38). One of the largest datasets available is the  
96 city’s 311 database. The 311 service is a designated system for non-emergency information and  
97 reporting, which currently consists of a call service, app, and online system that allows  
98 individuals, organizations, and businesses to access New York City’s government services and  
99 information (39). Those accessing the 311 service are able to report various environmental,  
100 legislative, and social issues; reports are then referred to an appropriate agency. This process  
101 guarantees anonymity. Inquiries are only processed to the level of information that the person or  
102 persons is willing to provide (e.g. location information). We accessed all 311 data inquiries from  
103 2010–2019 focusing on 311 inquiries specific to bed bugs (all bed bug related inquiries as well  
104 as official complaints).

105

106 *NYC housing maintenance code complaints: official bed bug complaints*

107           The Department of Housing Preservation and Development (HPD) compiles housing  
108 maintenance code complaints that are reported from NYC 311 Citizen Services Center or Online  
109 database and the Code Enforcement Borough Offices. Only formal complaints that violate the  
110 New York City Housing Maintenance Code (HMC) or the New York State Multiple Dwelling  
111 Law (MDL) are recorded by HPD. The Housing Maintenance Code helps preserve decent  
112 housing, prevent housing from deteriorating, and ensures minimal standards for housing and  
113 basic decencies to already deteriorated buildings which must serve as dwellings until they can be  
114 replaced (35). This housing code provides a comprehensive list of standards for housing  
115 maintenance, including urban pests such as bed bugs.

116 Under the Housing and Maintenance Code tenants have the right to a bed bug free  
117 environment (36). Specifically, in the Housing and Maintenance Code, Subchapter 2, Article 4  
118 names bed bugs as a Class B violation, meaning that the landlord is legally obligated to eradicate  
119 (*sic*) the problem within 30 days (36). Tenants are therefore incentivized to report probable bed  
120 bug infestation through 311 to officially document their complaint. These official complaints  
121 were made publicly available in 2014 and are updated continuously. We compiled all Housing  
122 Maintenance Code Complaints from 2014–2019 that were the result of a potential bed bug  
123 complaint, and, as a point of comparison, also compiled cockroach infestation complaints from  
124 the same data.

125

#### 126 *Building owner reports of bed bug infestation*

127 In 2017, New York City passed an additional bed bug disclosure law that requires  
128 property owners of multiple dwellings (buildings with 3+ residential units) to report annually to  
129 the Department of Housing Preservation the number of units infested with bed bugs or that were  
130 treated for bed bugs (37). They must also disclose these numbers to all tenants at the time of  
131 lease renewal or upon the start of a new lease, as well as posting this information in a prominent  
132 location within the building. Failure to provide this information results in a Housing  
133 Maintenance Code Violation. While this data is required to be accessible to the public, currently  
134 New York City does not have this data published through NYC Open Data. We obtained bed bug  
135 infestations reported by property owners for 2018 through a Freedom of Information  
136 Request. Data were reported by building, and included information on the total number of  
137 residential units, the number that had experienced a bed bug infestation, the number of  
138 infestations treated, and the number of units re-infested.

139 *Statistical Analyses*

140 *Assessing 311 inquiries linked to bed bugs from 2010 - 2019*

141 We used a text search algorithm to isolate all 311 inquiries that included bed bugs in the  
142 descriptor as the reason for the call. We categorized the reason for the complaint and the  
143 organization or action that fielded the inquiry following the initial inquiry (Appendix Table 1).  
144 While Housing Maintenance Code complaints were only published from 2014, 311 general  
145 inquiries have been published since 2010. This dataset allows us to: understand the pattern and  
146 quantity of inquiries about bed bugs since 2010 and evaluate the patterns present in 311 data  
147 generally.

148

149 *Assessing the geographical distribution of bed bug infestation in New York City*

150 To assess the geographical distribution of bed bug complaints we calculated the number  
151 of bed bug complaints per Neighborhood Tabulation Area (NTA) (Figure 2). NTAs are  
152 combinations of whole census-tract level population data with a minimum of 15,000 residents  
153 per aggregation (40). These areas are used to predict New York City's population projections per  
154 micro-area. Unlike census tracts, which are prone to high sampling error, using NTAs as a  
155 geographic boundary helps to standardize areas by population while providing a more  
156 statistically reliable estimate of population (40). To standardize the number of bed bug  
157 complaints per population, we divided the total number of bed bug complaints by the estimated  
158 population for each year and multiplied that ratio by 100,000. We mapped this information using  
159 QGIS software (41).

160

161 *Modeling the Temporal Patterns of Housing Maintenance Code Complaints for Bed Bugs and*  
162 *Cockroaches*

163 To evaluate the temporal patterns of code complaints for bed bugs and cockroaches and  
164 account for the apparent seasonality, we modeled the number of complaints per month as a  
165 function of time using linear regression incorporating a sinusoidal curve. We standardized the  
166 total number of official bed bug complaints by the total number of 311 general inquiries. We first  
167 evaluated the model residuals of a simple sinusoidal curve function. This step allowed us to  
168 examine the general patterns of complaints excluding the harmonic patterns and evaluate if a  
169 linear function was appropriate for the data. We then incorporated the sinusoidal curve into the  
170 linear function. We repeated this analysis for each of the New York City boroughs, standardizing  
171 the number of complaints per borough using population estimates obtained by the American  
172 Community Survey (24).

173

174 *Comparing landlord reports of bed bug infestation to 311 resident complaints for 2018*

175 We examined the concordance between the 311-complaint data and recently-available  
176 data on building owner reports for each NTA through linear regression.

177

178 Results

179 *Summary of 311 inquiries linked to bed bugs from 2010 - 2019*

180 From 2010–2019 there were a total of 72,701,278 inquiries processed by 311 either  
181 online, through the app, or by phone. Since 2010, the number of inquiries processed by 311 has  
182 steadily decreased (Fig. 1). When we selected for inquiries that included bed bugs in the  
183 descriptor, we identified 185,289 inquiries specific to bed bugs. These inquiries were processed



184 as 18 specific descriptions which were forwarded to seven different city departments or by the  
185 general 311 call center (Appendix Table 1). Three of these descriptions are types of reports for  
186 general pests, which may or may not include bed bugs as the primary complaint. The majority of  
187 bed bug related inquiries were forwarded to the Department of Housing Preservation and  
188 Development (n = 130,502). The inquiries processed by this department include bed bug  
189 complaints for all residential and single room occupancy areas, as well as hotels. The  
190 Department of Health and Mental Hygiene (DOHMH) and the Housing Authority (HA) fielded  
191 the second (n = 33,250) and third (n = 12,062) largest number of inquiries respectively. The  
192 majority of the inquiries processed by these two agencies were informational in nature, asking  
193 either for a general brochure about bed bugs (n = 30,447), how to comply with bed bug related  
194 ordinances (n = 1,854), or tips on how to prevent and get rid of bed bug infestation (n = 480).

195         Similar to the general 311 inquiries, bed bug related inquiries decreased from 2010–2019.  
196 The largest peak in bed bug related inquiries occurred in August 2010 (n = 6,737). Throughout  
197 the time series, bed bug inquiries peaked during late summer (June–August) and decreased from  
198 September through April, creating a distinct seasonal pattern. This seasonal pattern was not  
199 evident in the general 311 inquiries.

200

### 201 *Geographical distribution of bed bug infestation in New York City*

202         From 2014–2019, the number of official bed bug complaints processed by the department  
203 of Housing Preservation and Development (HPD) were widely distributed throughout the five  
204 boroughs (Fig. 2). The Bronx had the greatest proportional number of bed bug complaints per  
205 borough population per 100,000 ( $724.8 \pm \text{CI } 711, 738.8$ ), followed by Brooklyn ( $559.7 \pm \text{CI}$   
206  $550.7, 568.8$ ), Manhattan ( $575.6 \pm \text{CI } 564.1, 587.3$ ), Queens ( $281.8 \pm \text{CI } 275, 288.7$ ), and Staten

207 Island ( $191.4 \pm \text{CI } 179.3, 204.2$ ) for the study period (Appendix Table 2). Areas that were  
208 positive for bed bug complaints tended to remain positive throughout the study term (Fig. 2).  
209 During 2015, bed bug complaints peaked and then decreased until 2019 across all boroughs (Fig.  
210 3).

211

### 212 *Temporal Patterns of Housing Maintenance Code Complaints for Bed Bugs and Cockroaches*

213 Similar to general 311 bed bug inquiries (Fig. 1), official bed bug complaints followed  
214 seasonal patterns, peaking during summer (June–August) and bottoming out during winter and  
215 spring (December–April) (Fig. 4A). When this harmonic pattern was extracted, the residuals  
216 formed a linear decreasing trend from 2014–2019 (Fig. 4C). The complete model fit both the  
217 seasonal and decreasing linear trends well (Fig. 4E). The decreasing temporal trend was  
218 significant in the full model (Table 3), indicating that bed bug complaints significantly decreased  
219 from 2014–2019. Cockroach complaints followed a similar seasonal pattern to bed bug  
220 complaints (Fig. 4B). We modeled cockroach complaints using the same model structure, which  
221 fit the data well (Fig. 4F). However, unlike bed bug complaints, we observed a significant  
222 positive temporal trend (Table 3).

223 We used the same model structure to assess the temporal patterns of bed bug complaints  
224 for each of the individual boroughs (Fig. 5). Across all the boroughs, bed bug complaints  
225 decreased (Table 2). Once the harmonic pattern was extracted, Brooklyn had the greatest yearly  
226 rate of decrease, followed by Manhattan and the Bronx, Queens and lastly Staten Island. The  
227 seasonal pattern was evident across all the boroughs. Reflecting the total number of complaints  
228 per borough, the  $R^2$  was highest for Brooklyn ( $R^2 = 0.82$ ) and the Bronx ( $R^2 = 0.76$ ), followed by  
229 Manhattan ( $R^2 = 0.75$ ) and Queens ( $R^2 = 0.71$ ), and lastly Staten Island ( $R^2 = 0.37$ ).

230

231 *Comparing landlord reports of bed bug infestation to 311 resident complaints for 2018*

232       When we compared 2018 Housing Preservation bed bug complaint data (total number of  
233 complaints per NTA) to building owner reported bed bug infestation (number of reports per  
234 NTA) we found significant positive agreement ( $0.653 \pm CI 4.06, 12.4, p < 0.001$ ) between the  
235 two measures (Fig. 6). The correlation between the two measures was high ( $R^2 = 0.60$ ). When we  
236 subset by borough the correlation for each borough was similar for Manhattan, Queens, and  
237 Bronx ( $R^2$  of 0.44, 0.40, 0.47) and for Staten Island and Brooklyn ( $R^2$  of 0.27, 0.30).

238

239 Discussion

240       During the time period assessed, both general 311 inquiries about bed bugs (2010–2019)  
241 and official bed bug complaints (2014–2019) decreased in New York city. This decrease was  
242 significant both when standardized by population and against the totality of 311 inquiries, and is  
243 directly contrasted to patterns observed in cockroach complaints. These contrasting patterns, as  
244 well as strong seasonal patterns, indicate that the decrease in complaints are not an artifact of  
245 overall 311 or reporting use. Ultimately, disclosure laws, new approaches in pest management,  
246 increased knowledge, and commitment to inspections have likely all contributed to this decrease  
247 in bed bug complaints in New York City.

248       New York City has enacted one of the most comprehensive strategies to combat bed bug  
249 infestations among major US cities (7). The strategy is a combination of policy and enforcement.  
250 Ordinances assign responsibility for treatment to landlords, and subsequent disclosure of  
251 infestations to tenants. The city then commits substantial resources to rapidly respond to all bed  
252 bug related complaints, even employing a canine team to help assist in timely inspections (42).

253 While our study cannot individually and specifically assess the efficacy of these policies, the  
254 decrease in bed bug complaints across all boroughs provides evidence that they are working. A  
255 previous modeling study by Xie et al not only demonstrates that disclosure laws can reduce the  
256 spread of bed bug infestations, but also that they can reduce the costs incurred by landlords and  
257 tenants (43). Strong disclosure laws like those in New York City may therefore offer a cost-  
258 effective road map for other cities struggling with bed bugs.

259 Best practices for bed bug management have also improved over the course of the  
260 epidemic, and could account for the decrease in complaints. These improvements are not specific  
261 to New York. There are no comparable studies from other major cities—if such studies were to  
262 show a similar downward trend it might be reasonable to attribute the decrease in 311 complaints  
263 in New York to improved pest management methods alone. Governmental and nongovernmental  
264 entities have also increased educational efforts, and these may have improved knowledge among  
265 landlords and residents (although this has not been formally assessed). Improved access to  
266 information may also contribute to the decrease in calls to the 311 system. Residents may choose  
267 to work directly with their landlord and not involve the city. If this were the case, we might  
268 expect to see areas in which mandated landlord reporting was out-of-step with 311 inquiries.  
269 Instead we saw high concordance between the two ( $R^2 = 0.60$ ).

270 The decrease in bed bug complaints was observed across all New York City boroughs.  
271 However, the rate of decline was not equivalent. Higher income boroughs (Manhattan and  
272 Brooklyn) saw steeper declines than Queens and Staten Island. The differences in the rates of  
273 decline are very likely due to differences in financial means to properly treat infestations and  
274 incorporate recommendations of Integrated Pest Management (IPM). Differences in trust and  
275 access to city government and services are also likely to affect rates of decline (7, 16, 44–46). In

276 Chicago, bed bug infestation was highly associated with lower-income neighborhoods,  
277 crowding, and eviction notices (22). While we did not specifically assess sociodemographic  
278 features, it is likely that similar patterns exist in New York City and indeed have been noted in  
279 smaller scale surveys and assessments (44, 45).

280 Despite substantial decreases in all boroughs, on the finer scale of NTD areas there are  
281 many persistently infested areas (Fig. 2). Many, though not all, of these persistently infested  
282 areas are located in lower-income areas. Appropriate treatment for bed bugs can cost well over  
283 \$1000 (7, 16), in addition residents are faced with additional costs incurred from loss of personal  
284 property and time spent dealing with infestation (47). While New York City has made a vested  
285 effort to emphasize that tenants are not financially responsible for bed bug treatment, fear of  
286 eviction or cost may prevent tenants from reporting bed bug infestation, which may promote  
287 spread to non-infested units. Areas with limited financial resources are therefore potentially at  
288 risk for persistent or entrenched bed bug infestation.

289 Our study was not without limitations. Self-reported and landlord reporting of bed bug  
290 infestation, like all Volunteered Geographic Information (VGI), have inherent biases and  
291 inaccuracies (45). Sociodemographic differences have been documented between bed bug  
292 complaints and confirmed bed bug violations, with non-verified bed bug complaints (complaints  
293 that resulted in a negative bed bug inspection) occurring primarily in higher-income, majority  
294 white non-Hispanic neighborhoods (45). However, barring a standardized spatial sampling  
295 design, the VGI provided by New York City Open Data is likely the largest and most complete  
296 proxy available to estimate the spatial and longitudinal patterns in bed bug infestations.

297 Bed bugs are tied inextricably to their human hosts and the dynamic urban environment.  
298 Their resurgence in urban spaces and the necessity of rapid intervention strategies have elicited

299 health policy, increased monitoring, and novel treatment strategies over the past 10 years. While  
300 there is continued need to increase active surveillance for bed bug infestations, particularly  
301 among vulnerable populations, the policy and public health approaches employed by New York  
302 City appear to be a step in the right direction.

303

#### 304 Acknowledgments

305 We thank the other participants in the workshop “Socio-Spatial Ecology of the Bed Bug and its  
306 Control”—Claudia Arevalo, Dawn Biehler, Stephen Billings, Warren Booth, Ludovica Gazze,  
307 Loren Henderson, Sara McLafferty, Shannon Sked, and Chris Sutherland—for discussions that  
308 helped shape this paper. This work was supported by the National Socio-Environmental  
309 Synthesis Center under funding received from National Science Foundation Grant DBI-1639145.  
310 KPH was supported by the University of Pennsylvania Diversity Postdoc Fellowship and  
311 National Institute of General Medical Sciences of the National Institutes of Health under Award  
312 Number K12GM081259

313

314 The authors declare no competing interests.

315

316

317

318

319

320

321 Tables

322 **Table 1. Description of databases used for the analyses.** Descriptive properties of each of the  
 323 datasets including timeframe, georeferencing information, organizational management of  
 324 database, and codes used for analysis.

| Database                                                  | Timeframe Available | Georeferencing Information | Description                                                            | Code or text search used                     | Department |
|-----------------------------------------------------------|---------------------|----------------------------|------------------------------------------------------------------------|----------------------------------------------|------------|
| 311 Inquires                                              | 2010–2019           | Not georeferenced          | All calls, online inquiries, and inquiries registered through the app  | N/A                                          | NYC 311    |
| 311 bed bug specific requests                             | 2010–2019           | Not georeferenced          | Official bed bug complaints, as well as general bed bug inquires       | Text search using bed bug terms <sup>2</sup> | NYC 311    |
| Official bed bug complaints <sup>3</sup>                  | 2014–2019           | Georeferenced              | Official bed bug complaints registered with HPD <sup>4</sup>           | Problem Category Values: 2818 & 2517         | HPD        |
| Official cockroach complaints                             | 2014–2019           | Georeferenced              | Official cockroach complaints registered with HPD                      | Problem Category Values: 2514 & 2823         | HPD        |
| Building owner reported bed bug infestations <sup>5</sup> | 2018                | Georeferenced              | Units infested by bed bugs as reported by building managers to the HDP | Infested units                               | HPD        |

325 <sup>1</sup> 311 bed bug specific requests are a subset of general 311 inquiries extracted through text search

326 <sup>2</sup> Text search terms included: bedbug(s), bed bug(s), and pest(s). Pests according to the housing  
 327 maintenance code include bed bugs as well as “any unwanted member of class Insecta”(36)

328 <sup>3</sup> Formal bed bug complaints have been archived by the HDP since 2014 and are a subset of 311  
 329 inquiries

330 <sup>4</sup> Department of Housing and Preservation

331 <sup>5</sup> Report obtained by a freedom of information request

332 **Table 2. Association between time and official bed bug and cockroach complaints**  
333 **accounting for seasonality.** Model results of a linear harmonic model assessing the association  
334 between month and number of official bed bug complaints and cockroach complaints from 2014  
335 – 2019. Bed bug and cockroach complaints were standardized by the total number of 311  
336 inquiries and multiplied by 100,000.

337

| Variable                 | Estimate | Confidence Interval | p-value  |
|--------------------------|----------|---------------------|----------|
| Bed Bug Complaints       |          |                     |          |
| Time <sup>1</sup>        | -0.021   | -0.027– -0.014      | p < .001 |
| Amplitude <sup>2</sup>   | 36       | 29–43               | p < .001 |
| Phase Shift <sup>1</sup> | 1.1      | 1.0–1.2             | p < .001 |
| Cockroach Complaints     |          |                     |          |
| Time <sup>1</sup>        | 0.081    | 0.069–0.093         | p < .001 |
| Amplitude <sup>2</sup>   | 58       | 46.5–67.9           | p < .001 |
| Phase Shift <sup>1</sup> | 1.6      | 1.4–1.8             | p < .001 |

338 <sup>1</sup>Measured in months

339 <sup>2</sup>Measured in the number of complaints per total number of 311 inquires multiplied by 100,000

340

341

342

343

344

345

346

347

348



349 **Table 3. Association between time and official bed bug complaints for each borough**  
 350 **accounting for seasonality.** Results of a linear harmonic model standardized per population  
 351 size for each of the five New York City boroughs from 2014–2019.

352

| Borough          | r-squared | Model Variables          | Model Coefficient ±<br>(95% confidence interval) | p-value  |
|------------------|-----------|--------------------------|--------------------------------------------------|----------|
| Bronx            | 0.76      | Time <sup>1</sup>        | -3.4e-03 ± CI (-4.3e-03 – -2.5e-03)              | p < .001 |
|                  |           | Amplitude <sup>2</sup>   | 4.5 ± CI (3.5–5.5)                               | p < .001 |
|                  |           | Phase Shift <sup>1</sup> | 1.0 ± CI (1.0–1.6)                               | p < .001 |
| Brooklyn         | 0.82      | Time <sup>1</sup>        | -3.5e-03 ± CI (-4.1e-03 – -2.9e-03)              | p < .001 |
|                  |           | Amplitude <sup>2</sup>   | 2.9 ± CI (2.2–3.5)                               | p < .001 |
|                  |           | Phase Shift <sup>1</sup> | 0.99 ± CI (0.95–1.1)                             | p < .001 |
| Queens           | 0.71      | Time <sup>1</sup>        | -1.2e-03 ± CI (-1.5e-03 – -8.2e-04)              | p < .001 |
|                  |           | Amplitude <sup>2</sup>   | 1.5 CI ± (1.1–1.9)                               | p < .001 |
|                  |           | Phase Shift <sup>1</sup> | 0.90 CI ± (0.87–0.94)                            | p < .001 |
| Manhattan        | 0.75      | Time <sup>1</sup>        | -2.9e-03 ± CI (-3.6e-03 – -2.2e-03)              | p < .001 |
|                  |           | Amplitude <sup>2</sup>   | 2.8 ± CI (2.1–3.6)                               | p < .001 |
|                  |           | Phase Shift <sup>1</sup> | 1.1 ± CI (1.0–1.2)                               | p < .001 |
| Staten<br>Island | 0.37      | Time <sup>1</sup>        | -1.1e-03 ± CI (-2.5e-03 – -6.1e-04)              | p < .001 |
|                  |           | Amplitude <sup>2</sup>   | 0.78 ± CI (0.46–1.3)                             | p < .001 |
|                  |           | Phase Shift <sup>1</sup> | 1.4 ± CI (1.2–2.2)                               | p < .001 |

353 <sup>1</sup>Measured in months

354 <sup>2</sup>Measured in the number of complaints per borough population multiplied by 100,000

355

356

357

358

359 **Figures**

360 **Figure 1. New York City 311 data usage and bed bug related inquiries.** New York City 311  
361 inquiries, bed bug related inquiries, which include official bed bug complaints registered to HPD,  
362 and bed bug related inquiries standardized by the total number of 311 inquiries from 2010–2019.  
363 Bed bug related inquiries were extracted using a text search algorithm. Dates of the two bed bug  
364 disclosure laws are indicated by a dashed line  
365

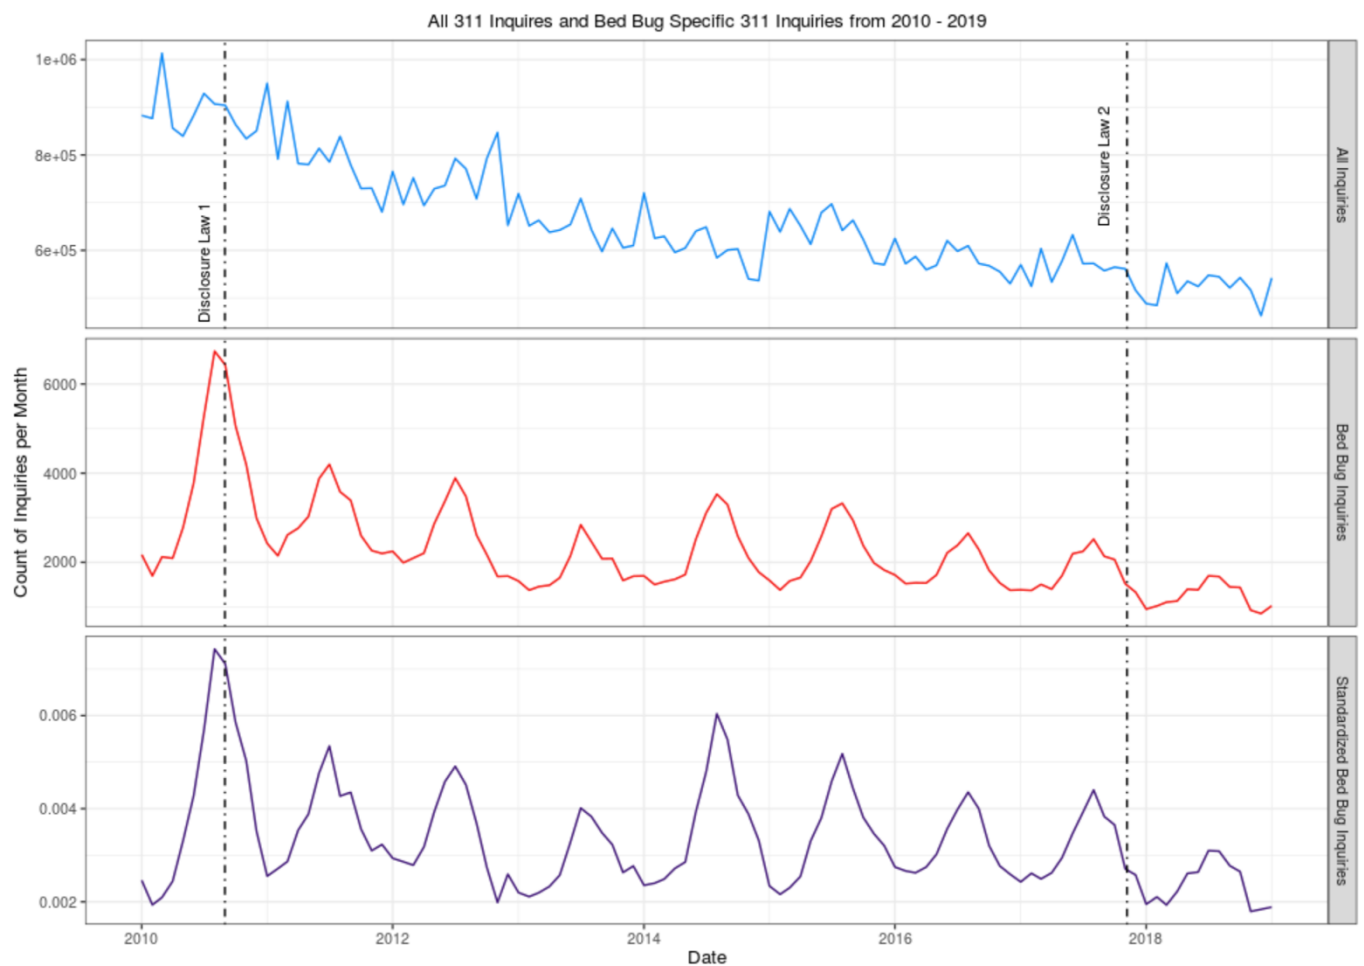

366

367

368 **Figure 2. Spatial temporal distribution of bed bug complaints in New York City. Spatial**  
369 **temporal distribution of official bed bug complaints registered to HPD from 2014–2019**  
370 **standardized by the population per NTD area per 100,000.**

371

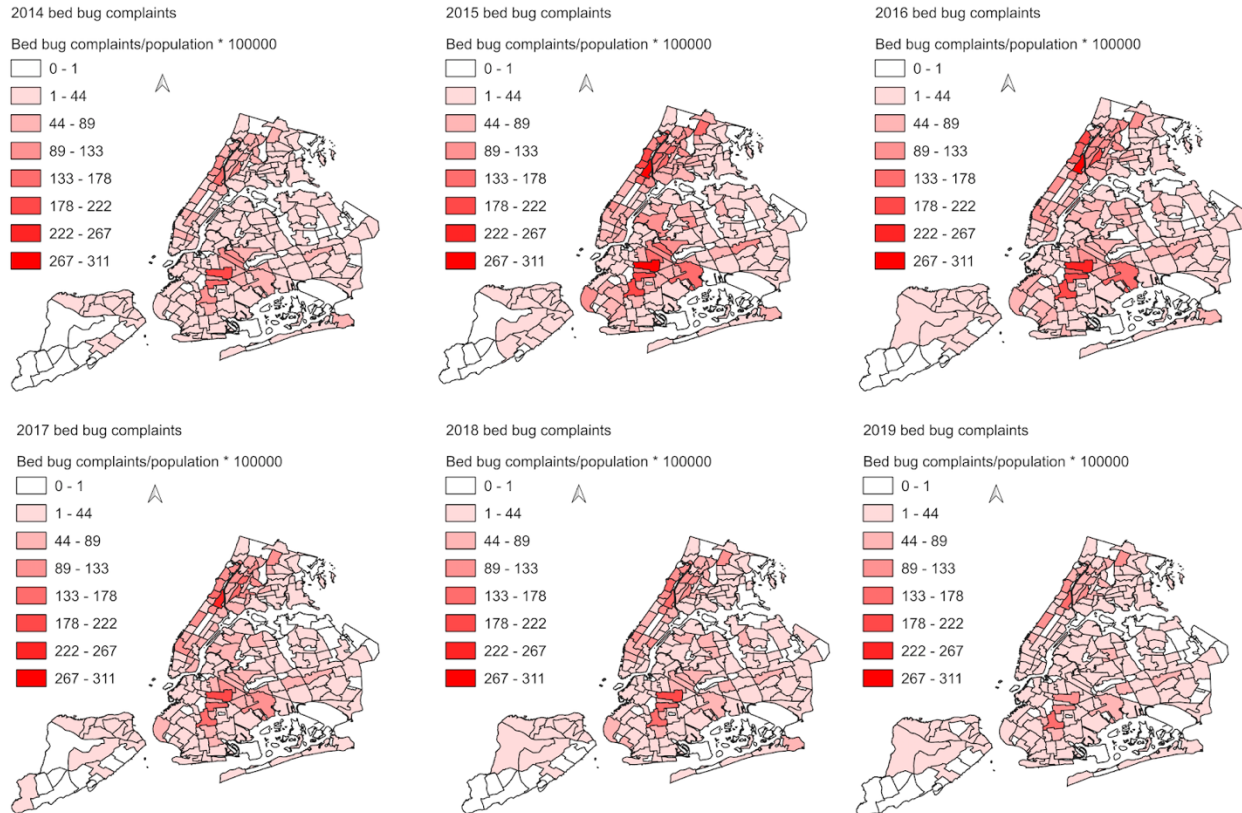

372

373

374

375

376

377

378

379

380 **Fig. 3 Official bed bug complaints for each borough per year.** Official bed bug complaints  
381 registered to HPD standardized by borough population per 100,000 from 2014–2019.

382

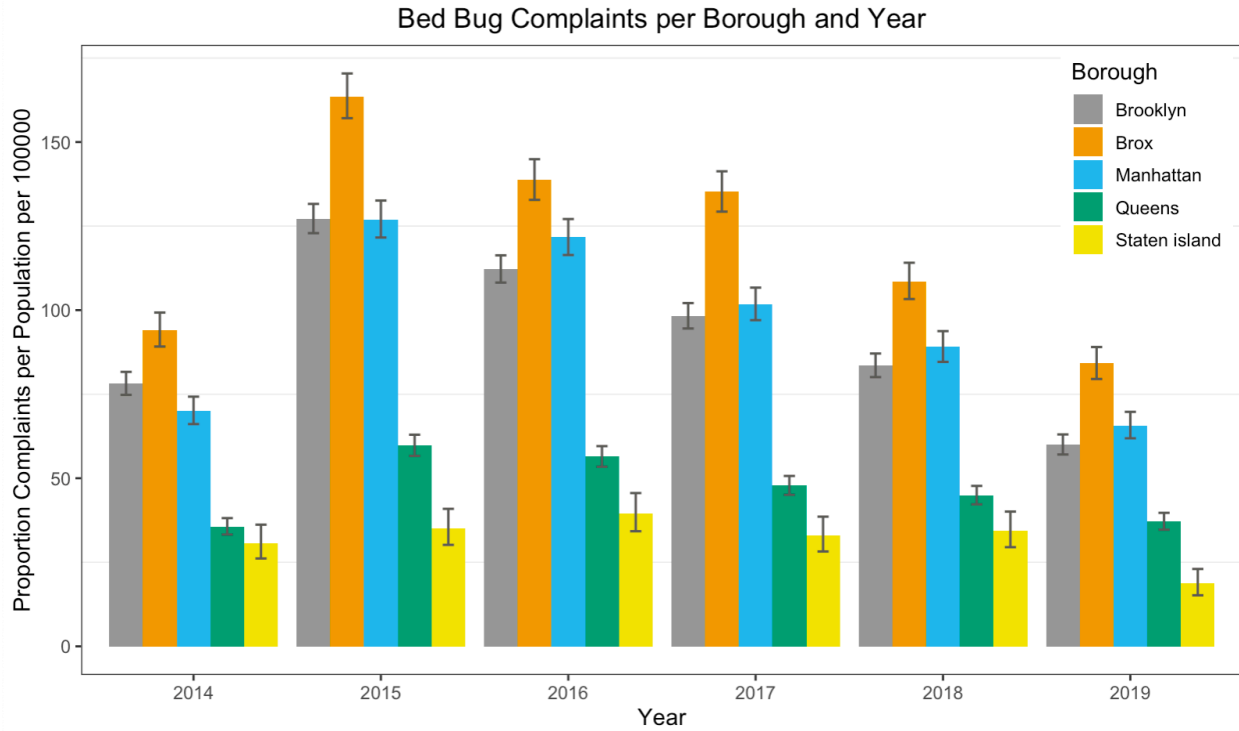

383

384

385

386

387

388

389

390

391

392

393

394 **Figure 4. Longitudinal analysis of official bed bug and cockroach complaints registered to**  
395 **HPD.** Graphical representation of the results of a linear harmonic model assessing the temporal  
396 relationship of official bed bug and cockroach complaints from 2014–2019. (A) Monthly official  
397 bed bug complaints standardized by the total number of 311 inquiries per 100,000 with monthly  
398 harmonic curve. (B) Monthly cockroach complaints standardized by the total number of 311  
399 inquiries per 100,000 with monthly harmonic curve. (C) Official bed bug complaint residual  
400 pattern after extracting the seasonal oscillation from panel A. (D) Official cockroach complaint  
401 residual pattern after extracting the seasonal oscillation from panel B. (E) Complete linear  
402 harmonic model assessing official bed bug complaints over time. (F) Complete linear harmonic  
403 model assessing official cockroach complaints over time.

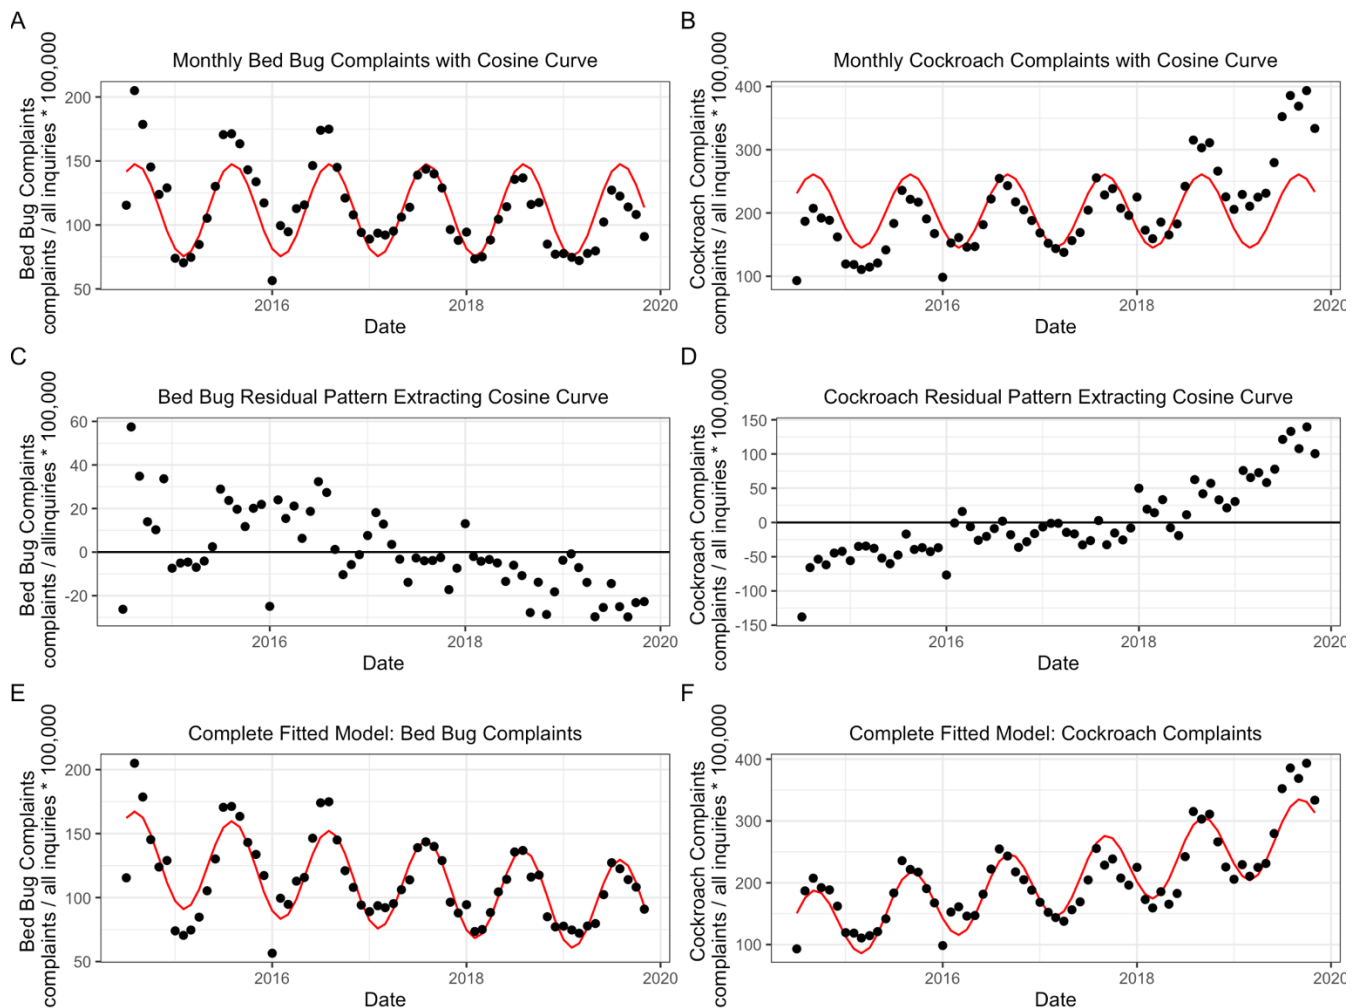

404 **Figure 5. Harmonic linear model assessing the temporal patterns of official bed bug**  
405 **complaints for each of the five NYC boroughs.** Graphical representation of model results  
406 assessing official bed bug complaints per each of the NYC borough standardized by borough  
407 population from 2014–2019. Model fit assessed by R-squared and slope of the linear residual  
408 pattern when only extracting seasonality are reported.  
409

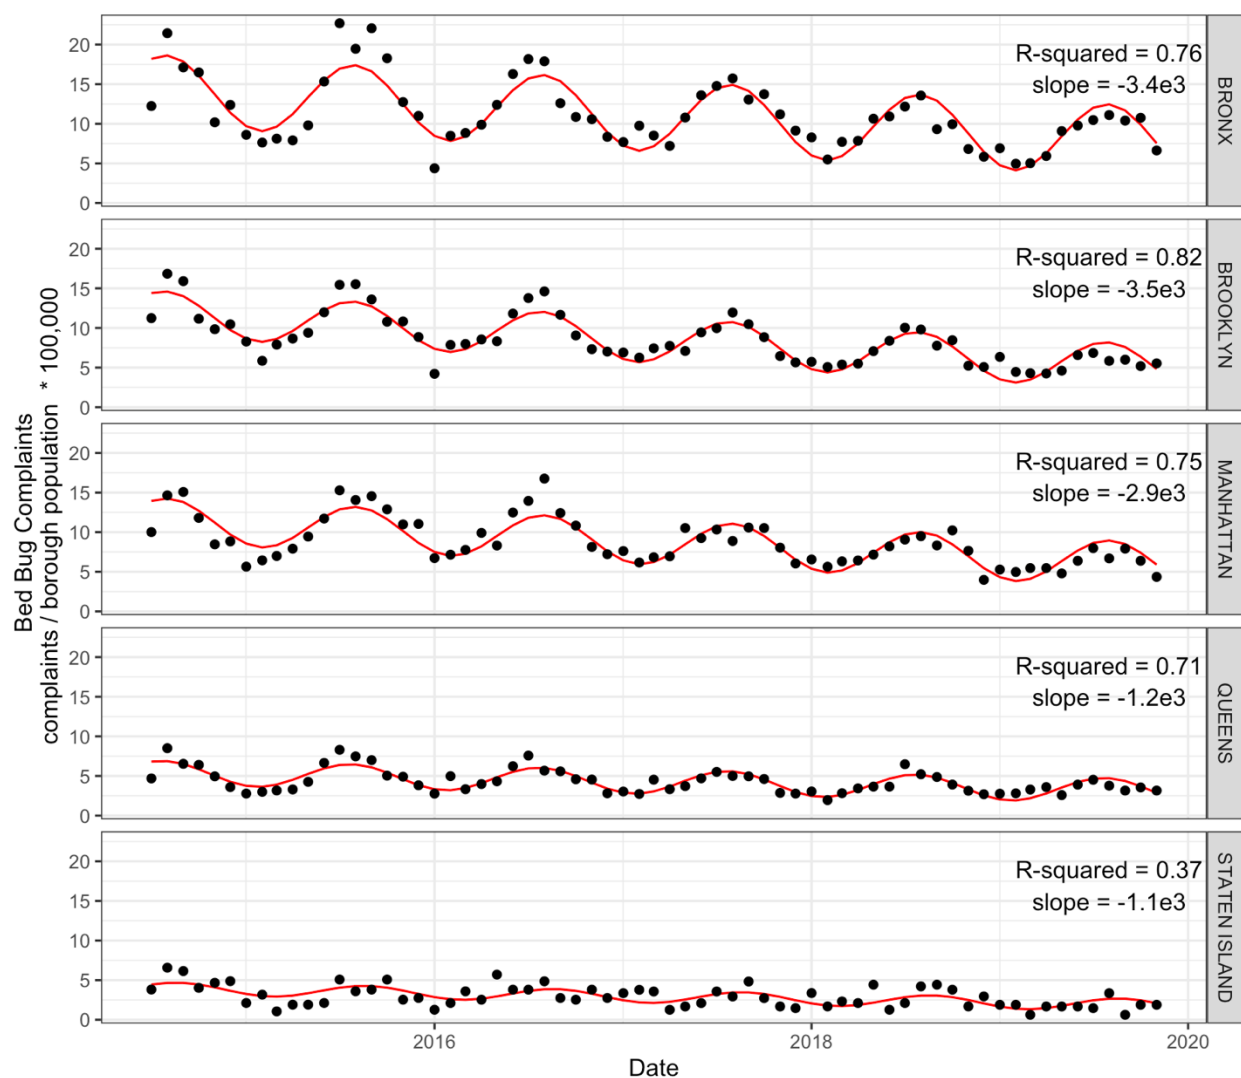

410

411

412 **Figure 6. Comparison between building manager reported bed bug infestation and official**  
413 **bed bug complaints registered to HPD for 2018.** Correlation between official bed bug  
414 complaints from residents and building manager reported infestation was high ( $R^2 = 0.60$ ).

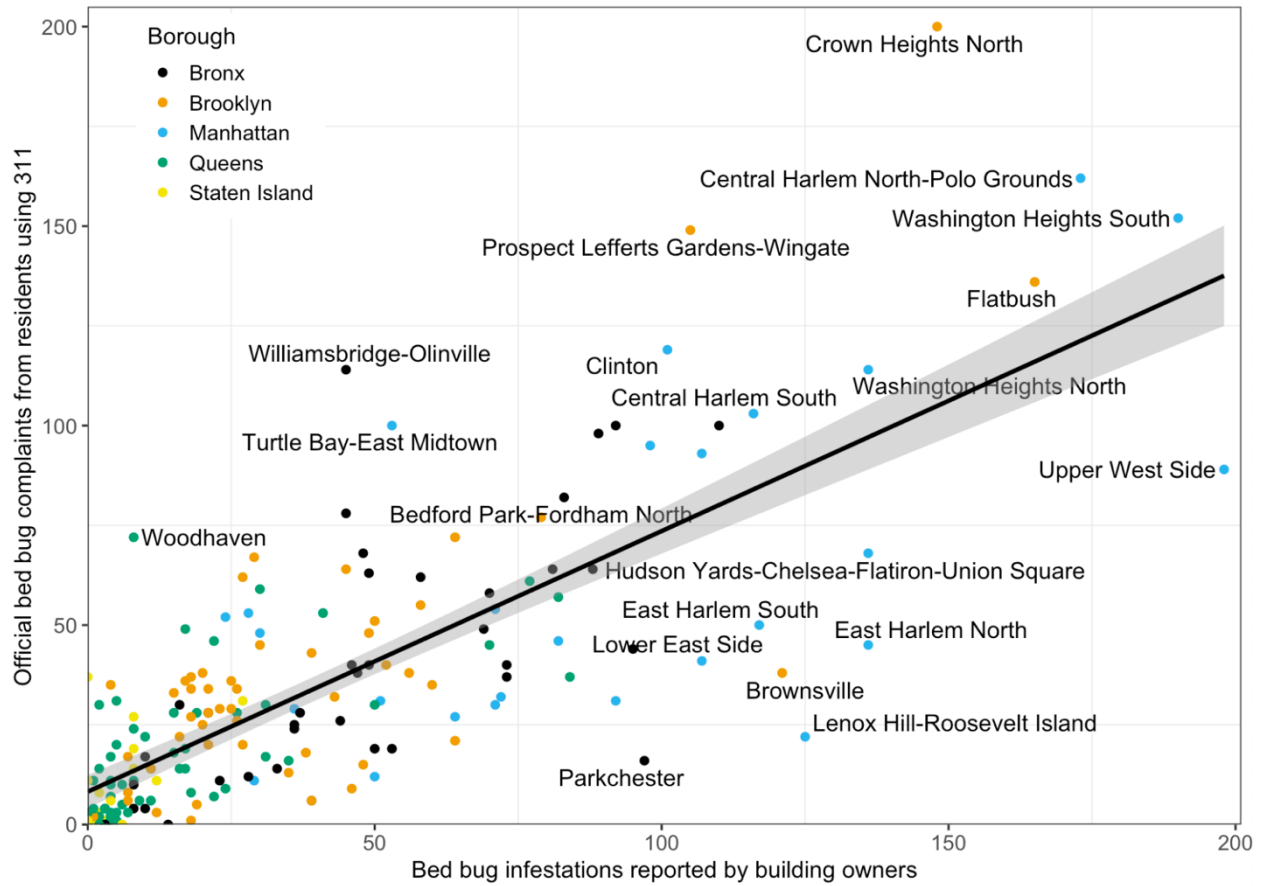

415  
416  
417  
418  
419  
420  
421  
422

423 Citations

- 424 1. Wang L, Xu Y, Zeng L. Resurgence of Bed Bugs (Hemiptera: Cimicidae) in Mainland  
425 China. *Florida Entomologist*. 2013 Mar;96(1):131–6. DOI: 10.1653/024.096.0117
- 426 3. Doggett SL, Dwyer DE, Peñas PF, Russell RC. Bed Bugs: Clinical Relevance and Control  
427 Options. *Clinical Microbiology Reviews*. 2012 Jan 1;25(1):164–92. DOI:  
428 10.1128/CMR.05015-11
- 429 4. Kilpinen O, Jensen K-MV, Kristensen M. Bed Bug Problems in Denmark, with a european  
430 perspective. *Proceedings of the Sixth International Conference on Urban Pests*. 2008;  
431 395:399.
- 432 5. Gangloff-Kaufmann J, Hollingsworth C, Hahn J, Hansen L, Kard B, Waldvogel M. Bed  
433 Bugs in America: A Pest Management Industry Survey. *American Entomologist*.  
434 2006;52(2):105–6. DOI: 10.1093/ae/52.2.105
- 435 6. Scarpino SV, Althouse BM. Uncovering the hidden cost of bed bugs. *Proc Natl Acad Sci*  
436 *USA*. 2019 Apr 9;116(15):7160–2. DOI: 10.1073/pnas.1902404116
- 437 7. Schneider D. They're Back: Municipal Responses to the Resurgence of Bed Bug  
438 Infestations. *Journal of the American Planning Association*. 2019 Apr 3;85(2):96–113.  
439 DOI: 10.1080/01944363.2019.1591294
- 440 8. Doggett SL, Geary MJ, Russell RC. The Resurgence of Bed Bugs in Australia: With Notes  
441 on Their Ecology and Control. *Environmental Health*. 2004 Feb 4; 4(2):30–38.
- 442 9. Romero A, Potter MF, Potter DA, Haynes KF. Insecticide Resistance in the Bed Bug: A  
443 Factor in the Pest's Sudden Resurgence? *Journal of Medical Entomology*. 2007  
444 Mar;44(2):175-178. DOI:10.1603/0022-2585(2007)44[175:IRITBB]2.0.CO;2
- 445 10. Davies TGE, Field LM, Williamson MS. The re-emergence of the bed bug as a nuisance  
446 pest: implications of resistance to the pyrethroid insecticides. *Medical and Veterinary*  
447 *Entomology*. 2012 Sep;26(3):241–54. DOI: 10.1111/j.1365-2915.2011.01006.x
- 448 11. Raab RW, Moore JE, Vargo EL, Rose L, Raab J, Culbreth M, et al. New Introductions,  
449 Spread of Existing Matrilines, and High Rates of Pyrethroid Resistance Result in Chronic  
450 Infestations of Bed Bugs (*Cimex lectularius* L.) in Lower-Income Housing. *PLoS ONE*.  
451 2016 Feb 22;11(2):e0117805. DOI: 10.1371/journal.pone.0117805
- 452 12. Benoit JB, Adelman ZN, Reinhardt K, Dolan A, Poelchau M, Jennings EC, et al. Unique  
453 features of a global human ectoparasite identified through sequencing of the bed bug  
454 genome. *Nat Communications*. 2016 Apr;7(1):10165.
- 455 13. Szalanski AL, Austin JW, McKern JA, Steelman CD, Gold RE. Mitochondrial and  
456 ribosomal internal transcribed spacer 1 diversity of *Cimex lectularius* (Hemiptera:  
457 Cimicidae). *J Med Entomology*. 2008 Mar;45(2):229–36. DOI: 10.1603/0022-  
458 2585(2008)45[229:MARITS]2.0.CO;2



- 459 14. Changlu Wang, Kurt Saltzmann, Eva Chin, Gary W. Bennett, Timothy Gibb.  
460 Characteristics of *Cimex lectularius* (Hemiptera: Cimicidae), Infestation and Dispersal in a  
461 High-Rise Apartment Building. *Journal of Economic Entomology*. 2010 Feb  
462 1;103(1):172–7. DOI:10.1603/EC09230
- 463 15. Cooper R, Wang C, Singh N. Mark-Release-Recapture Reveals Extensive Movement of  
464 Bed Bugs (*Cimex lectularius* L.) within and between Apartments. Lazzari CR, editor.  
465 PLoS ONE. 2015 Sep 9;10(9):e0136462. DOI: 10.1371/journal.pone.0136462
- 466 16. M. Wong, N. Vaidyanathan, R. Vaidyanathan, Strategies for Housing Authorities and Other  
467 Lower-Income Housing Providers to Control Bed Bugs. *Journal of Housing and*  
468 *Community Development; Washington* **70**, 20–28 (2013).
- 469 17. M. F. Potter, The History of Bed Bug Management—With Lessons from the Past. *American*  
470 *Entomologist* **57**, 14–25 (2011).
- 471 18. X. Bonnefoy, H. Kampen, K. Sweeney, *Public health significance of urban pests* (WHO  
472 Regional Office for Europe, 2008).
- 473 19. BedBug Central. History and Resurgence [internet]. 2008 [cited 2020 Apr 26]. Available  
474 from: <https://www.bedbugcentral.com/bedbugs101/history-resurgence>
- 475 20. Buckley C. Legislature Passes Bedbug-Notification Law. *The New York Times* [Internet].  
476 2010 Jun 24 [cited: 26 Apr 2020]; Available from:  
477 <https://www.nytimes.com/2010/06/25/nyregion/25bedbugs.html>
- 478 21. E. Pilkington, How bedbugs invaded New York. *The Guardian* (2010) (April 26, 2020).
- 479 22. C. Sutherland, A. J. Greenlee, D. Schneider, Socioeconomic drivers of urban pest  
480 prevalence. *People and Nature*, pan3.10096 (2020).
- 481 City of New York. NYC Health: Bedbugs Information for Homeowners & Tenants [Internet].  
482 2020 [cited: 15 March 2020]. Available from:  
483 [https://www1.nyc.gov/site/doh/health/health-topics/bedbugs-information-for-](https://www1.nyc.gov/site/doh/health/health-topics/bedbugs-information-for-homeowners-and-tenants.page)  
484 [homeowners-and-tenants.page](https://www1.nyc.gov/site/doh/health/health-topics/bedbugs-information-for-homeowners-and-tenants.page)
- 485 23. NYC Health. Community Health Survey [Internet]. 2020 [cited 2020 Apr 26]. Available  
486 from: <https://www1.nyc.gov/site/doh/data/data-sets/community-health-survey.page>
- 487 24. Goddard J, deShazo R. Bed Bugs (*Cimex lectularius*) and Clinical Consequences of Their  
488 Bites. *JAMA*. 2009 Apr 1;301(13):1358–66. DOI: 10.1001/jama.2009.405
- 489 25. Doggett SL, Russell R. Bed bugs – what the GP needs to know. *Australian Family*  
490 *Physician*. 2009 Nov 1;38(11):880–4. PMID: 19893834.
- 491 26. Divjan A, daSilva HA, Acosta LM, Rundle AG, Weichsel A, Montfort WR, et al.  
492 Detectable IgG against a *Cimex lectularius* allergen after a report of bed bug bites among

- 493 NYC children. *Journal of Allergy and Clinical Immunology*. 2019 Feb;143(2):AB236.  
494 DOI: 10.1016/j.jaci.2018.12.721
- 495 27. Ashcroft R, Seko Y, Chan LF, Dere J, Kim J, McKenzie K. The mental health impact of  
496 bed bug infestations: a scoping review. *Int J Public Health*. 2015 Nov;60(7):827–37. DOI:  
497 10.1007/s00038-015-0713-8
- 498 29. S. R. Susser, *et al.*, Mental health effects from urban bed bug infestation (*Cimex lectularius*  
499 L.): a cross-sectional study. *BMJ Open; London* 2 (2012).
- 500 29. Laliberté M, Hunt M, Williams-Jones B, Feldman DE. Health Care Professionals and  
501 Bedbugs: An Ethical Analysis of a Resurgent Scourge. *HEC Forum*. 2013 Sep;25(3):245–  
502 55. DOI: 10.1007/s10730-013-9209-1
- 503 30. Miller DM. Bed Bug Action Plan for Home Health Care and Social Workers. Virginia  
504 Department of Agriculture and Consumer Services. 2014 Aug;1–4.
- 505 31. Jacobson JB, Wheeler K, Hoffman R, Mitchell Y, Beckman J, Mehler L, et al. Acute  
506 illnesses associated with insecticides used to control bed bugs--seven states, 2003-2010.  
507 Morbidity and Mortality Weekly Report. 2011 Sep 23;60(37):1269-1274. PMID:  
508 21937972
- 509 32. Bashir B, Sharma SG, Stein HD, Sirota RA, D'Agati VD. Acute Kidney Injury Secondary  
510 to Exposure to Insecticides Used for Bedbug (*Cimex lectularis*) Control. *American Journal*  
511 *of Kidney Diseases*. 2013 Nov 1;62(5):974–7. DOI: 10.1053/j.ajkd.2013.04.020
- 512 33. Salazar R, Castillo-Neyra R, Tustin AW, Borrini-Mayorí K, Náquira C, Levy MZ. Bed  
513 Bugs (*Cimex lectularius*) as Vectors of *Trypanosoma cruzi*. *Am J Trop Med Hyg*. 2015  
514 Feb 4;92(2):331–5. DOI: 10.4269/ajtmh.14-0483
- 515 34. Leulmi H, Bitam I, Berenger JM, Lepidi H, Rolain JM, Almeras L, et al. Competence of  
516 *Cimex lectularius* Bed Bugs for the Transmission of *Bartonella quintana*, the Agent of  
517 Trench Fever. Turell MJ, editor. *PLoS Negl Trop Dis*. 2015 May 22;9(5):e0003789. DOI:  
518 10.1371/journal.pntd.0003789
- 519 35. Title 27 - Chapter 2: Housing Maintenance Code. New York City Administration Code.  
520 2014. Available from:  
521 <https://www1.nyc.gov/assets/buildings/pdf/HousingMaintenanceCode.pdf>
- 522 36. Local Laws of the City of New York for the Year 2017. No. 69. Available from:  
523 <https://www1.nyc.gov/assets/buildings/pdf/HousingMaintenanceCode.pdf>
- 524 37. City of New York Open Data NYC Open. 311 Call Center Inquiry. City Government. 13  
525 June 2016. Available from: [https://data.cityofnewyork.us/City-Government/311-Call-](https://data.cityofnewyork.us/City-Government/311-Call-Center-Inquiry/wewp-mm3p)  
526 [Center-Inquiry/wewp-mm3p](https://data.cityofnewyork.us/City-Government/311-Call-Center-Inquiry/wewp-mm3p).

- 527 38. City of New York. 2020. NYC 311 The official website of the city of new york: About NYC  
528 311. [Internet] 2020 [cited 30 Jan 2018]. Available from: [https://portal.311.nyc.gov/about-](https://portal.311.nyc.gov/about-nyc-311/)  
529 [nyc-311/](https://portal.311.nyc.gov/about-nyc-311/)
- 530 39. City of New York. NYC planning: Neighborhood Tabulation Areas (Formerly  
531 “Neighborhood Projection Areas”) [Internet]. 2020 [cited: 10 March 2020]. Available  
532 from: <https://www1.nyc.gov/site/planning/data-maps/open-data/dwn-nynta.page>
- 533 41. , *QGIS Geographic Information System*. (Open Source Geospatial Foundation Project).
- 534 40. City of New York. NYC housing preservation and development: Bed bugs. [Internet]. 2020  
535 [cited: 10 March 2020]. Available from: [https://www1.nyc.gov/site/hpd/services-and-](https://www1.nyc.gov/site/hpd/services-and-information/bedbugs.page)  
536 [information/bedbugs.page](https://www1.nyc.gov/site/hpd/services-and-information/bedbugs.page)
- 537 41. S. Xie, A. L. Hill, C. R. Rehmann, M. Z. Levy, Dynamics of bed bug infestations and  
538 control under disclosure policies. *Proc Natl Acad Sci USA* **116**, 6473–6481 (2019). DOI:  
539 10.1073/pnas.1814647116
- 540 42. N. Ralph, H. E. Jones, L. E. Thorpe, Self-reported bed bug infestation among New York  
541 City residents: prevalence and risk factors. *Journal of Environmental Health* **76**, 38-  
542 (2013). PMID: 23947287
- 543 43. S. McLafferty, D. Schneider, K. Abelt, Placing volunteered geographic health information:  
544 Socio-spatial bias in 311 bed bug report data for New York City. *Health & Place*, 102282  
545 (2020). DOI: 10.1016/j.healthplace.2019.102282
- 546 46. L. Carter, F. Bélanger, The utilization of e-government services: citizen trust, innovation  
547 and acceptance factors\*. *Information Systems Journal* **15**, 5–25 (2005).
- 548 47. Centers for Disease Control and Prevention. CDC - Bed Bugs. [Internet] 2016 [cited 30 Jan  
549 2018]. Available from: <https://www.cdc.gov/parasites/bedbugs/index.html>

550  
551  
552  
553  
554  
555  
556  
557  
558  
559  
560  
561  
562  
563  
564
